# Supplementary material
Source: PubMed Central journal article supplement (PMC2948671)
Supplement: NIHMS238555-supplement-1.pdf [file NIHMS238555-supplement-1.pdf]

**Supplementary Table 1:** Primer pairs used to amplify the Fen1 5' flanking region

| Position <sup>a</sup> | Orientation | Sequence <sup>b</sup> ( 5' → 3' )                  | Constructs |
|-----------------------|-------------|----------------------------------------------------|------------|
| -1821bp ~<br>632 bp   | Forward     | GCGCGAGCTCGGGAGCTTTGTGGACCAGTGTCTATAGACACCAAGCTGAG | pGL4-FP1   |
|                       | Reverse     | GCGGGCTAGCCTAGGCAGGAAAGGGGCCTAAACAACCTCAAG         |            |
| 352bp ~<br>2662 bp    | Forward     | GCGCGAGCTCGTGAGACCCCATGGGAAGCGCCTCCGGGAGC          | pGL4-FP2   |
|                       | Reverse     | GCGGGCTAGCCGGCAACACAGAGGAGGGATGACTAAAAAAG          |            |
| -1821bp ~<br>352 bp   | Forward     | GCGCGAGCTCGGGAGCTTTGTGGACCAGTGTCTATAGACACCAAGCTGAG | pGL4-FP3   |
|                       | Reverse     | GCGGGCTAGCCGCTCCCGGAGGCGCTTCCCATGGGGTCTCA          |            |
| -1191bp ~<br>632 bp   | Forward     | GCGCGAGCTCGCTTCTGACCTCCTGATCCGCTCGCC               | pGL4-FP4   |
|                       | Reverse     | GCGGGCTAGCCTAGGCAGGAAAGGGGCCTAAACAACCTCAAG         |            |
| -701bp ~<br>632 bp    | Forward     | GCGCGAGCTCGTTCCCCCAAATGATAAAGACAATC                | pGL4-FP5   |
|                       | Reverse     | GCGGGCTAGCCTAGGCAGGAAAGGGGCCTAAACAACCTCAAG         |            |
| -421bp ~<br>632 bp    | Forward     | GCGCGAGCTCGGCACGGGTTCGGCAGAAGAACTTTC               | pGL4-FP6   |
|                       | Reverse     | GCGGGCTAGCCTAGGCAGGAAAGGGGCCTAAACAACCTCAAG         |            |
| -281bp ~<br>632 bp    | Forward     | GCGCGAGCTCGGGCAAGGGGCTTCCCCCTCCCCAC                | pGL4-FP7   |
|                       | Reverse     | GCGGGCTAGCCTAGGCAGGAAAGGGGCCTAAACAACCTCAAG         |            |
| 70bp ~<br>632 bp      | Forward     | GCGCGAGCTCGGCGGTGGAGAAGGGTACGCCAGGGT               | pGL4-FP8   |
|                       | Reverse     | GCGGGCTAGCCTAGGCAGGAAAGGGGCCTAAACAACCTCAAG         |            |
| -458bp ~<br>278 bp    | Forward     | GCGCGAGCTCGTCCACCAATAAACATTTGCCAGGGC               | pGL4-FP9   |
|                       | Reverse     | GCGGGCTAGCCCGCTCTCCCTTCTCAGCTTAGCGGCGGGTG          |            |

<sup>a</sup>Relative to the transcription start site.

<sup>b</sup>All primer pairs with a *Sac* I (forward primers) and *Nhe* I (reverse primers) restriction site (underlined sequences).

**Supplementary Table 2:** Characteristics of the subjects used in methylation analysis

| # | Age | Pathology                     | Stage  | TNM | ER  | PR  | Her-2 |
|---|-----|-------------------------------|--------|-----|-----|-----|-------|
| 1 | 47  | infiltrating ductal carcinoma | II     | 110 | +++ | +++ | -     |
| 2 | 44  | infiltrating ductal carcinoma | II     | 210 | -   | -   | +     |
| 3 | 50  | infiltrating ductal carcinoma | II-III | 110 | +++ | +++ | -     |
| 4 | 45  | infiltrating ductal carcinoma | II     | 110 | +++ | +++ | -     |
| 5 | 58  | infiltrating ductal carcinoma | IV     | 411 | -   | -   | -     |
| 6 | 34  | infiltrating ductal carcinoma | III    | 110 | -   | -   | -     |

**TNM:** T = Primary tumour, N = Regional lymph nodes, M = Distant metastasis;

**ER:** estrogen receptor; **PR:** progesterone receptor; **Her-2:** human epidermal growth factor receptor 2

**Supplementary Table 3:** *FEN1* over-expression in matched normal/cancer tissues on cancer profiling array I

| <b>Cancer</b>                | <b>Numbers of cancer samples with <i>FEN1</i> over-expression</b> | <b>Total numbers of paired normal/cancer tissues</b> | <b>Percentage of cancer samples with <i>FEN1</i> over-expression ( % )</b> |
|------------------------------|-------------------------------------------------------------------|------------------------------------------------------|----------------------------------------------------------------------------|
| Breast <sup>a</sup>          | 47                                                                | 50                                                   | 94.00                                                                      |
| Uterine <sup>a</sup>         | 33                                                                | 42                                                   | 78.57                                                                      |
| Ovarian <sup>a</sup>         | 12                                                                | 14                                                   | 85.71                                                                      |
| Cervical <sup>a</sup>        | 1                                                                 | 1                                                    | 100.00                                                                     |
| Lung <sup>a</sup>            | 17                                                                | 21                                                   | 80.95                                                                      |
| Kidney <sup>a</sup>          | 14                                                                | 20                                                   | 70.00                                                                      |
| Stomach <sup>a</sup>         | 19                                                                | 29                                                   | 65.52                                                                      |
| Colon <sup>a</sup>           | 21                                                                | 34                                                   | 61.76                                                                      |
| Rectum <sup>a</sup>          | 11                                                                | 18                                                   | 61.11                                                                      |
| Small intestine <sup>a</sup> | 1                                                                 | 2                                                    | -                                                                          |
| Pancreas <sup>b</sup>        | 1                                                                 | 1                                                    | -                                                                          |
| Prostate <sup>b</sup>        | 1                                                                 | 4                                                    | -                                                                          |
| Breast <sup>b</sup>          | 1                                                                 | 3                                                    | -                                                                          |
| Uterine <sup>b</sup>         | 1                                                                 | 2                                                    | -                                                                          |
| Ovarian <sup>b</sup>         | 0                                                                 | 4                                                    | -                                                                          |
| Colon <sup>b</sup>           | 1                                                                 | 2                                                    | -                                                                          |
| Rectum <sup>b</sup>          | 1                                                                 | 1                                                    | -                                                                          |

<sup>a</sup>Primary cancer, <sup>b</sup>Metastatic cancer, - Percentage not calculated due to small number of samples
